# Supplementary material for: Copper-catalyzed trifluoromethylation of alkenes with an electrophilic trifluoromethylating reagent
Source: PubMed Central journal article supplement (PMC3869243; doi:10.3762/bjoc.9.299), 2013-11-25

# Supporting Information

for

## Copper-catalyzed trifluoromethylation of alkenes with an electrophilic trifluoromethylating reagent

Xiao-Ping Wang<sup>1,2</sup>, Jin-Hong Lin<sup>1</sup>, Cheng-Pan Zhang<sup>1</sup>, Ji-Chang Xiao\*<sup>1</sup> and  
Xing Zheng<sup>2</sup>

Address: <sup>1</sup>Key Laboratory of Organofluorine Chemistry, Shanghai Institute of  
Organic Chemistry, Chinese Academy of Sciences, 345 Lingling Road,  
Shanghai 200032, China and <sup>2</sup>Institute of Pharmacy and Pharmacology,  
University of South China, Hengyang, Hunan 421001, China

Email: Ji-Chang Xiao\* - jchxiao@sioc.ac.cn

\* Corresponding author

### **Full experimental details, analytical data and spectra of the target compounds**

#### Tables of Contents

|                                                                                                                                     |    |
|-------------------------------------------------------------------------------------------------------------------------------------|----|
| 1. General information.....                                                                                                         | S2 |
| 2. General procedure for the trifluoromethylation of terminal alkenes.....                                                          | S2 |
| 3. Copies of <sup>1</sup> H NMR, <sup>19</sup> F NMR, and <sup>13</sup> C NMR spectra of the target compounds<br><b>2a–2o</b> ..... | S6 |

## 1. General information

$^1\text{H}$  and  $^{13}\text{C}$  NMR spectra were recorded at 400 and 100 MHz, respectively, with TMS as the internal standard.  $^{19}\text{F}$  NMR spectra were recorded at 376 MHz with  $\text{CFCl}_3$  (positive for downfield shifts) as the external standard. High resolution mass data were recorded on a Waters Micromass GCT Premier instrument. All reactions were monitored by TLC with Huanghai GF<sub>254</sub> silica gel coated plates. Flash column chromatography was carried out using 300–400 mesh silica gel.

## 2. General procedure for the trifluoromethylation of terminal alkenes

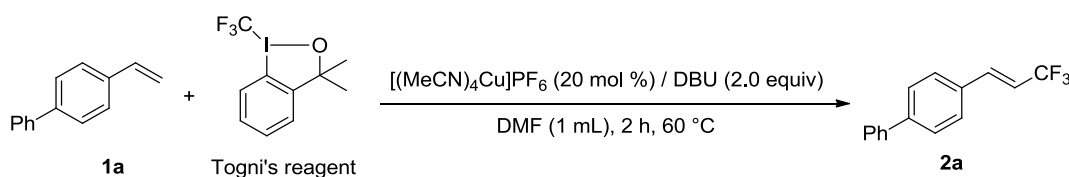

Into a solution of 4-vinylbiphenyl (90 mg, 0.5 mmol) in DMF (1 mL) was added Togni's reagent (415 mg, 1.25 mmol) and DBU (152 mg, 1 mmol), followed by  $[(\text{MeCN})_4\text{Cu}]\text{PF}_6$  (37 mg, 0.1 mmol). The reaction mixture was stirred at 60 °C for 2 h. After being cooled to room temperature, the mixture was subjected to column chromatography to afford pure product **2a**.

(E)-4-(3,3,3-Trifluoroprop-1-en-1-yl)-1,1'-biphenyl (**2a**)<sup>[1]</sup>

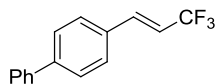

White solid, 90% yield;  $^1\text{H}$  NMR (400 MHz,  $\text{CDCl}_3$ ):  $\delta$  7.69 – 7.34 (m, 9H), 7.19 (dq,  $J = 16.0$  Hz, 2.0 Hz, 1H), 6.25 (dq,  $J = 16.0$  Hz, 6.6 Hz, 1H).  $^{19}\text{F}$  NMR (376 MHz,  $\text{CDCl}_3$ ):  $\delta$  -63.24 (dd,  $J = 6.6$  Hz, 2.0 Hz, 3F). GC-MS: 248  $[\text{M}]^+$ .

(E)-1-Methoxy-4-(3,3,3-trifluoroprop-1-en-1-yl)benzene (**2b**)<sup>[1]</sup>

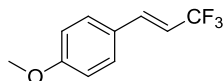

Colorless oil, 91% yield;  $^1\text{H}$  NMR (400 MHz,  $\text{CDCl}_3$ ):  $\delta$  7.40 (d,  $J = 8.8$  Hz, 2H), 7.09 (dq,  $J = 16.0$  Hz, 2.0 Hz, 1H), 6.91 (d,  $J = 8.8$  Hz, 2H), 6.06 (dq,  $J = 16.0$  Hz, 6.6 Hz, 1H) 3.84 (s, 3H).  $^{19}\text{F}$  NMR (376 MHz,  $\text{CDCl}_3$ ):  $\delta$  -62.89 (dd,  $J = 6.6$  Hz, 2.0 Hz, 3F). GC-MS: 202  $[\text{M}]^+$ .

(E)-2-Methoxy-6-(3,3,3-trifluoroprop-1-en-1-yl)naphthalene (**2c**)<sup>[1]</sup>

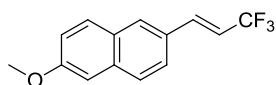

White solid, 88% yield;  $^1\text{H}$  NMR (400 MHz,  $\text{CDCl}_3$ ):  $\delta$  7.79 (s, 1H), 7.77 – 7.69 (m, 2H), 7.60 – 7.52 (m, 1H), 7.27 (dq,  $J = 16.0$  Hz, 2.0 Hz, 1H), 7.21 – 7.10 (m, 2H), 6.26 (dq,  $J = 16.0$  Hz, 6.5 Hz, 1H), 3.94 (s, 3H).  $^{19}\text{F}$  NMR (376 MHz,  $\text{CDCl}_3$ ):  $\delta$  –63.00 (dd,  $J = 6.5$  Hz, 2.0 Hz, 3F). GC-MS: 252  $[\text{M}]^+$ .

(*E*)-1-(*tert*-Butyl)-4-(3,3,3-trifluoroprop-1-en-1-yl)benzene (**2d**)<sup>[1]</sup>

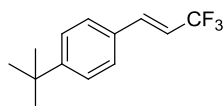

Colorless oil, 88% yield;  $^1\text{H}$  NMR (400 MHz,  $\text{CDCl}_3$ ):  $\delta$  7.49 – 7.31 (m, 4H), 7.13 (dq,  $J = 16.1$  Hz, 2.1 Hz, 1H), 6.16 (dq,  $J = 16.1$  Hz, 6.6 Hz, 1H), 1.33 (s, 9H).  $^{19}\text{F}$  NMR (376 MHz,  $\text{CDCl}_3$ ):  $\delta$  –63.17 (dd,  $J = 6.6$  Hz, 2.1 Hz, 3F). GC-MS: 228  $[\text{M}]^+$ .

(*E*)-1-Methyl-4-(3,3,3-trifluoroprop-1-en-1-yl)benzene (**2e**)<sup>[1]</sup>

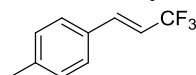

White solid, 92% yield;  $^1\text{H}$  NMR (400 MHz,  $\text{CDCl}_3$ ):  $\delta$  7.35 (d,  $J = 8.0$  Hz, 2H), 7.20 (d,  $J = 8.0$  Hz, 2H), 7.12 (dq,  $J = 16.1$  Hz, 2.0 Hz, 1H), 6.16 (dq,  $J = 16.1$  Hz, 6.6 Hz, 1H), 2.38 (s, 3H).  $^{19}\text{F}$  NMR (376 MHz,  $\text{CDCl}_3$ ):  $\delta$  –63.16 (dd,  $J = 6.6$  Hz, 2.0 Hz, 3F). GC-MS: 186  $[\text{M}]^+$ .

(*E*)-2-(3,3,3-Trifluoroprop-1-en-1-yl)naphthalene (**2f**)<sup>[1]</sup>

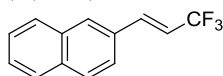

White solid, 92% yield;  $^1\text{H}$  NMR (400 MHz,  $\text{CDCl}_3$ ):  $\delta$  7.90 – 7.75 (m, 4H), 7.60 (d,  $J = 8.8$  Hz, 1H), 7.57 – 7.45 (m, 2H), 7.32 (dd,  $J = 16.0$  Hz, 1.5 Hz, 1H), 6.16 (dq,  $J = 16.0$  Hz, 6.6 Hz, 1H), 2.38 (s, 3H).  $^{19}\text{F}$  NMR (376 MHz,  $\text{CDCl}_3$ ):  $\delta$  –63.20 (dd,  $J = 6.6$  Hz, 1.5 Hz, 3F). GC-MS: 222  $[\text{M}]^+$ .

(*E*)-1-Bromo-2-(3,3,3-trifluoroprop-1-en-1-yl)benzene (**2g**)<sup>[2]</sup>

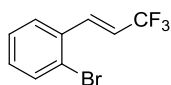

Colorless oil, 93% yield;  $^1\text{H}$  NMR (400 MHz,  $\text{CDCl}_3$ ):  $\delta$  7.66 – 7.47 (m, 3H), 7.39 – 7.29 (m, 1H), 7.25 – 7.20 (m, 1H), 6.16 (dq,  $J = 16.0$  Hz, 6.4 Hz, 1H).  $^{19}\text{F}$  NMR (376 MHz,  $\text{CDCl}_3$ ):  $\delta$  –63.67 (dd,  $J = 6.4$  Hz, 2.1 Hz, 3F). GC-MS: 250  $[\text{M}]^+$ .

(*E*)-1-Bromo-3-(3,3,3-trifluoroprop-1-en-1-yl)benzene (**2h**)<sup>[3]</sup>

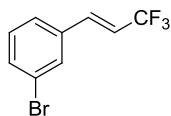

Colorless oil, 92% yield;  $^1\text{H}$  NMR (400 MHz,  $\text{CDCl}_3$ ):  $\delta$  7.61 (t,  $J = 1.6$  Hz, 1H), 7.51 (dt,  $J = 7.8$  Hz, 1.6 Hz, 1H), 7.38 (dt,  $J = 7.8$  Hz, 1.6 Hz, 1H), 7.27 (t,  $J = 7.8$  Hz, 1H),

7.08 (dq,  $J = 16.1$  Hz, 2.1 Hz, 1H), 6.21 (dq,  $J = 16.1$  Hz, 6.4 Hz, 1H).  $^{19}\text{F}$  NMR (376 MHz,  $\text{CDCl}_3$ ):  $\delta -63.64$  (dd,  $J = 6.4$  Hz, 2.1 Hz, 3F). GC-MS: 250  $[\text{M}]^+$ .

(*E*)-1-Bromo-4-(3,3,3-trifluoroprop-1-en-1-yl)benzene (**2i**)<sup>[4]</sup>

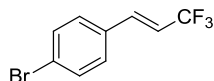

Colorless oil, 93% yield;  $^1\text{H}$  NMR (400 MHz,  $\text{CDCl}_3$ ):  $\delta$  7.53 (d,  $J = 8.4$  Hz, 2H), 7.32 (d,  $J = 8.4$  Hz, 2H), 7.09 (dq,  $J = 16.1$  Hz, 2.0 Hz, 1H), 6.20 (dq,  $J = 16.1$  Hz, 6.5 Hz, 1H).  $^{19}\text{F}$  NMR (376 MHz,  $\text{CDCl}_3$ ):  $\delta -63.52$  (dd,  $J = 6.5$  Hz, 2.1 Hz, 3F). GC-MS: 250  $[\text{M}]^+$ .

(*E*)-1-Chloro-4-(3,3,3-trifluoroprop-1-en-1-yl)benzene (**2j**)<sup>[4]</sup>

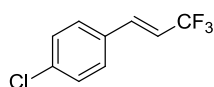

Colorless oil, 86% yield;  $^1\text{H}$  NMR (400 MHz,  $\text{CDCl}_3$ ):  $\delta$  7.44 – 7.31 (m, 4H), 7.11 (dq,  $J = 16.0$  Hz, 2.0 Hz, 1H), 6.18 (dq,  $J = 16.0$  Hz, 6.4 Hz, 1H).  $^{19}\text{F}$  NMR (376 MHz,  $\text{CDCl}_3$ ):  $\delta -63.48$  (dd,  $J = 6.4$  Hz, 2.0 Hz, 3F). GC-MS: 206  $[\text{M}]^+$ .

(*E*)-1-Fluoro-3-(3,3,3-trifluoroprop-1-en-1-yl)benzene (**2k**)<sup>[5]</sup>

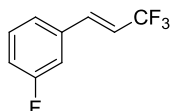

Colorless oil, 63% yield;  $^1\text{H}$  NMR (400 MHz,  $\text{CDCl}_3$ ):  $\delta$  7.41 – 7.32 (m, 1H), 7.25 – 7.20 (m, 1H), 7.19 – 7.05 (m, 3H), 6.21 (dq,  $J = 16.0$  Hz, 6.4 Hz, 1H).  $^{19}\text{F}$  NMR (376 MHz,  $\text{CDCl}_3$ ):  $\delta -63.63$  (dd,  $J = 6.4$  Hz, 2.0 Hz, 3F), -112.41 (td,  $J = 9.0$  Hz, 5.9 Hz, 1F). GC-MS: 190  $[\text{M}]^+$ .

(*E*)-3-(3,3,3-Trifluoroprop-1-en-1-yl)benzaldehyde (**2l**)

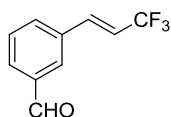

Colorless oil, 84% yield;  $^1\text{H}$  NMR (400 MHz,  $\text{CDCl}_3$ ):  $\delta$  10.05 (s, 1H), 7.97 (s, 1H), 7.90 (d,  $J = 7.6$  Hz, 1H), 7.71 (d,  $J = 7.6$  Hz, 1H), 7.59 (t,  $J = 7.6$  Hz, 1H), 7.22 (dq,  $J = 16.0$  Hz, 2.0 Hz, 1H), 6.32 (dq,  $J = 16.0$  Hz, 6.4 Hz, 1H).  $^{19}\text{F}$  NMR (376 MHz,  $\text{CDCl}_3$ ):  $\delta -63.70$  (dd,  $J = 6.4$  Hz, 2.0 Hz, 3F).  $^{13}\text{C}$  NMR (100 MHz,  $\text{CDCl}_3$ ):  $\delta$  191.52, 136.90, 136.26 (q,  $J = 6.8$  Hz), 134.38, 133.08, 131.10, 129.70, 128.13, 123.18 (q,  $J = 269.2$  Hz), 117.74 (q,  $J = 34.2$  Hz). IR (KBr): 3069, 2928, 2835, 2736, 1702, 1669, 1602, 1310, 1277, 1130, 972, 795, 685, 651, 579  $\text{cm}^{-1}$ . GC-MS: 200  $[\text{M}]^+$ . HRMS: Calculated for  $\text{C}_{10}\text{H}_7\text{OF}_3$ : 200.0449; Found: 200.0448.

(*E*)-1-Nitro-4-(3,3,3-trifluoroprop-1-en-1-yl)benzene (**2m**)<sup>[6]</sup>

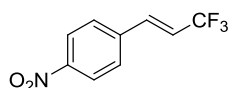

White solid, 76% yield; <sup>1</sup>H NMR (400 MHz, CDCl<sub>3</sub>): δ 8.27 (d, *J* = 8.8 Hz, 2H), 7.63 (d, *J* = 8.8 Hz, 2H), 7.22 (dq, *J* = 16.1 Hz, 2.0 Hz, 1H), 6.36 (dq, *J* = 16.1 Hz, 6.4 Hz, 1H). <sup>19</sup>F NMR (376 MHz, CDCl<sub>3</sub>): δ -64.02 (dd, *J* = 6.4 Hz, 2.0 Hz, 3F). GC-MS: 217 [M]<sup>+</sup>.

(*E*)-3-(3,3,3-Trifluoroprop-1-en-1-yl)benzo[*b*]thiophene (**2n**)

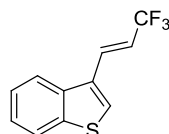

Colorless oil, 89% yield; <sup>1</sup>H NMR (400 MHz, CDCl<sub>3</sub>): δ 7.99 – 7.82 (m, 2H), 7.67 (s, 1H), 7.52 – 7.37 (m, 3H), 6.31 (dq, *J* = 16.0 Hz, 6.4 Hz, 1H). <sup>19</sup>F NMR (376 MHz, CDCl<sub>3</sub>): δ -63.42 (dd, *J* = 6.4 Hz, 2.0 Hz, 3F). <sup>13</sup>C NMR (100 MHz, CDCl<sub>3</sub>): δ 140.46, 136.90, 130.25, 129.75 (q, *J* = 7.1 Hz), 126.81 (q, *J* = 1.2 Hz), 125.04, 124.89, 123.50 (q, *J* = 268.9 Hz), 123.06, 121.67, 116.75 (q, *J* = 33.8 Hz). IR (KBr): 3072, 1663, 1511, 1427, 1369, 1298, 1288, 1272, 1128, 964, 891, 757, 730 cm<sup>-1</sup>. GC-MS: 228 [M]<sup>+</sup>. HRMS: Calculated for C<sub>11</sub>H<sub>7</sub>SF<sub>3</sub>: 228.0221; Found: 228.0217.

(*E*)-2-Bromo-6-(3,3,3-trifluoroprop-1-en-1-yl)pyridine (**2o**)

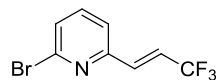

Colorless oil, 70% yield; <sup>1</sup>H NMR (400 MHz, CDCl<sub>3</sub>): δ 7.57 (t, *J* = 7.7 Hz, 1H), 7.46 (d, *J* = 7.7 Hz, 1H), 7.28 (d, *J* = 7.7 Hz, 1H), 7.08 (dq, *J* = 15.6 Hz, 2.0 Hz, 1H), 6.86 (dq, *J* = 15.6 Hz, 6.8 Hz, 1H). <sup>19</sup>F NMR (376 MHz, CDCl<sub>3</sub>): δ -64.08 (dd, *J* = 6.8 Hz, 2.0 Hz, 3F). <sup>13</sup>C NMR (100 MHz, CDCl<sub>3</sub>): δ 152.79, 142.55, 139.07, 134.90 (q, *J* = 6.7 Hz), 128.70, 123.17 (q, *J* = 269.2 Hz), 122.65, 121.52 (q, *J* = 34.4 Hz). IR (KBr): 3069, 2927, 2854, 1672, 1580, 1557, 1435, 1412, 1331, 1307, 1269, 1163, 1136, 985, 904, 786, 729, 661, 586 cm<sup>-1</sup>. GC-MS: 251 [M]<sup>+</sup>. HRMS: Calculated for C<sub>8</sub>H<sub>5</sub>BrNF<sub>3</sub>: 250.9557; Found: 250.9559.

## References

1. Lin, H.; Dong, X.; Li, Y.; Shen, Q.; Lu, L. *Eur. J. Org. Chem.* **2012**, 4675-4679.
2. Hafner, A.; Bräse, S. *Adv. Synth. Catal.* **2011**, 353, 3044-3048.
3. Fialkov, Yu. A.; Yagupol'skii, L. M. *Ukrainskii Khimicheskii Zhurnal (Russian Edition)* **1966**, 32, 996-1002.
4. Yasu, Y.; Koike, T.; Akita, M. *Chem. Commun.* **2013**, 49, 2037-2039.
5. Fuchikami, T.; Yatabe, M.; Ojima, I. *Synthesis* **1981**, 1981, 365-366.
6. Landge, S. M.; Borkin, D. A.; Török, B. *Tetrahedron Lett.* **2007**, 48, 6372-6376.

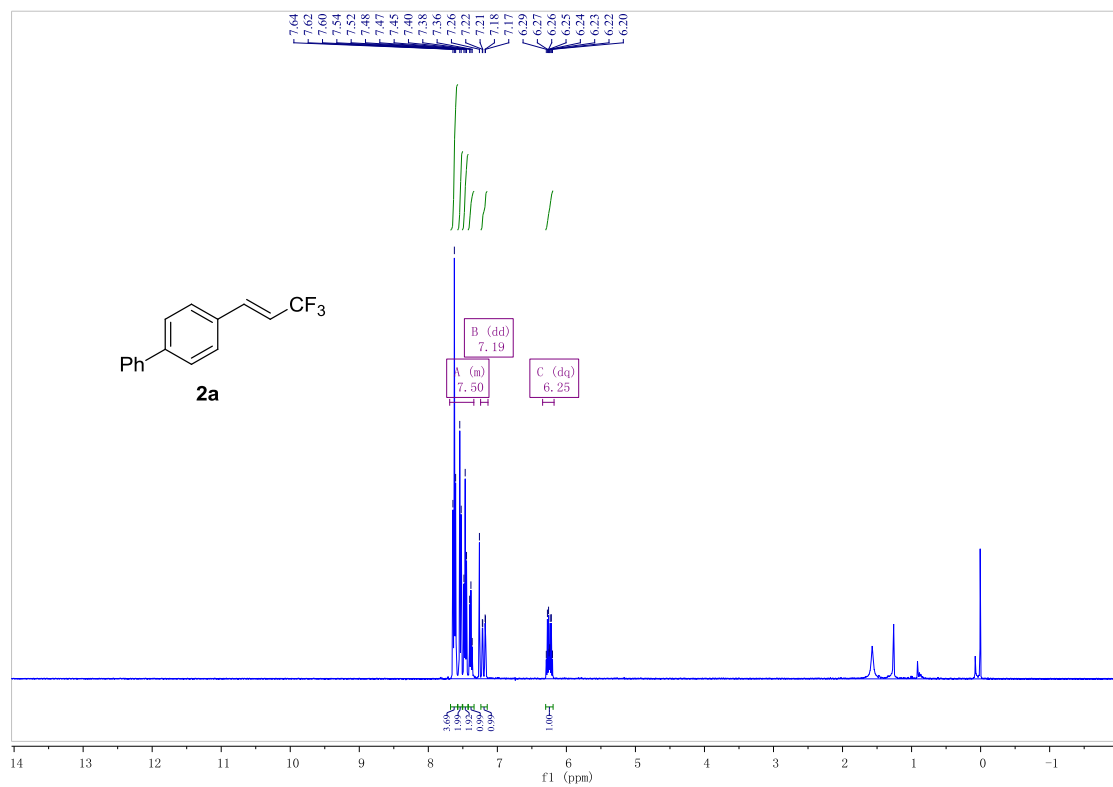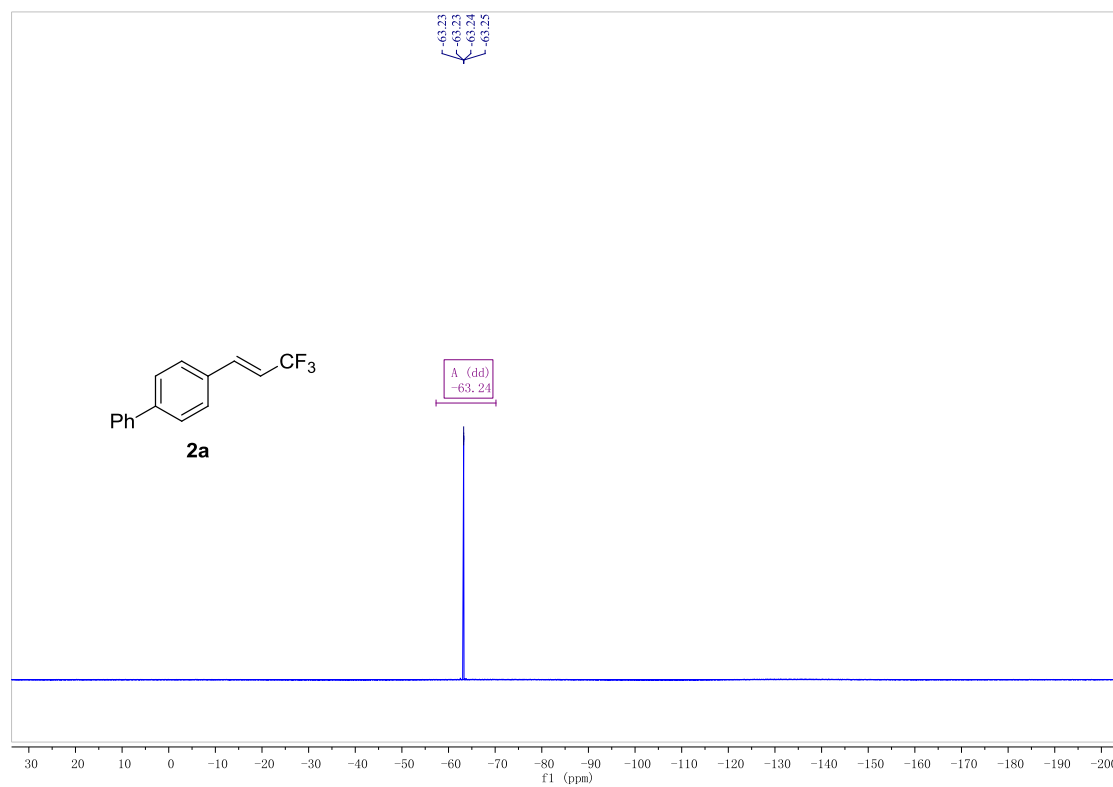

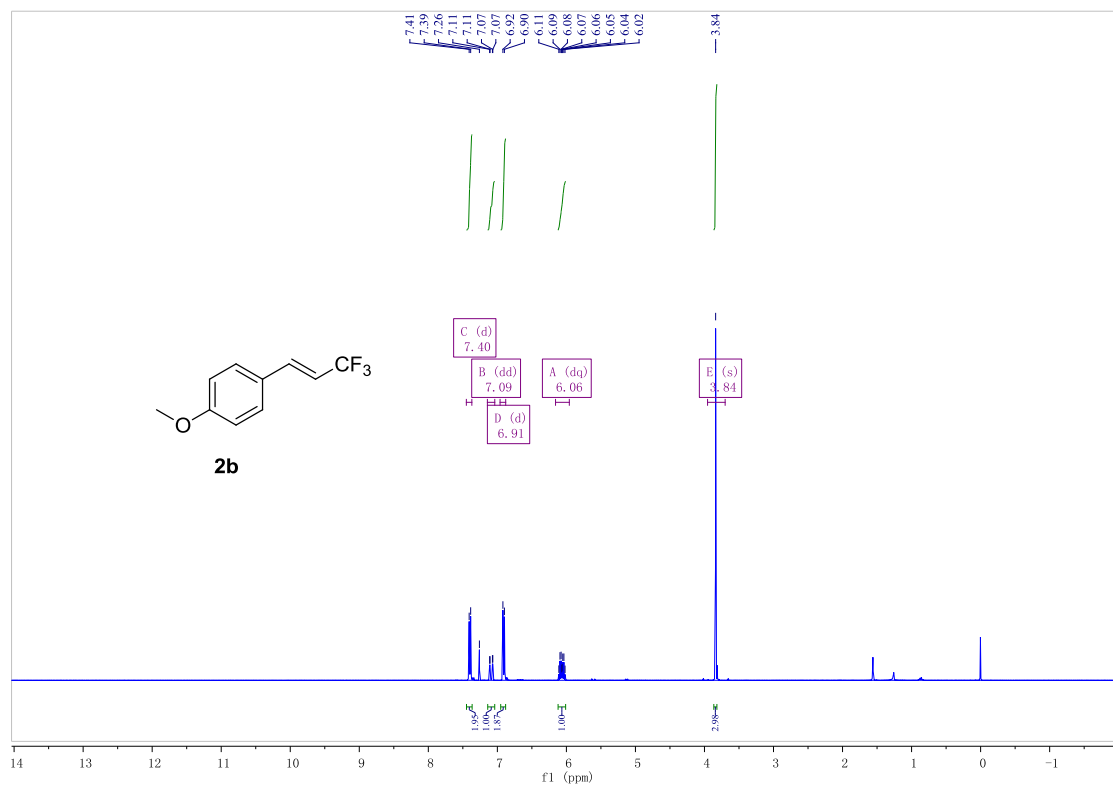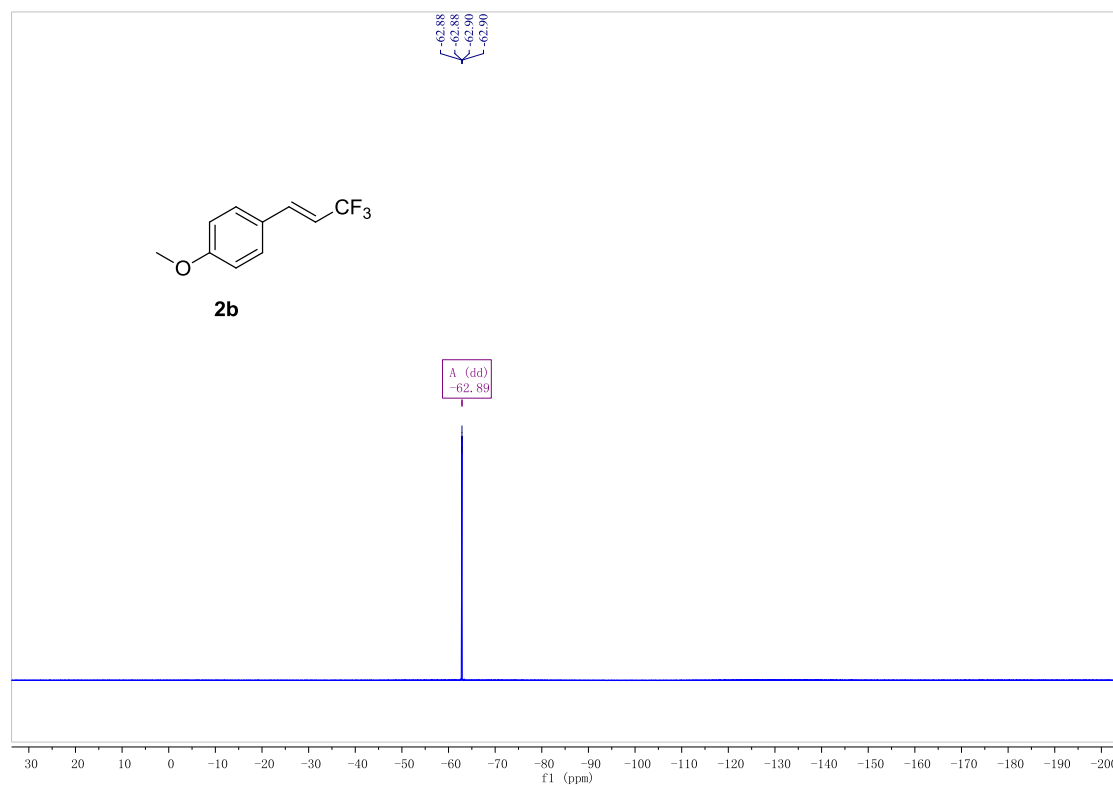

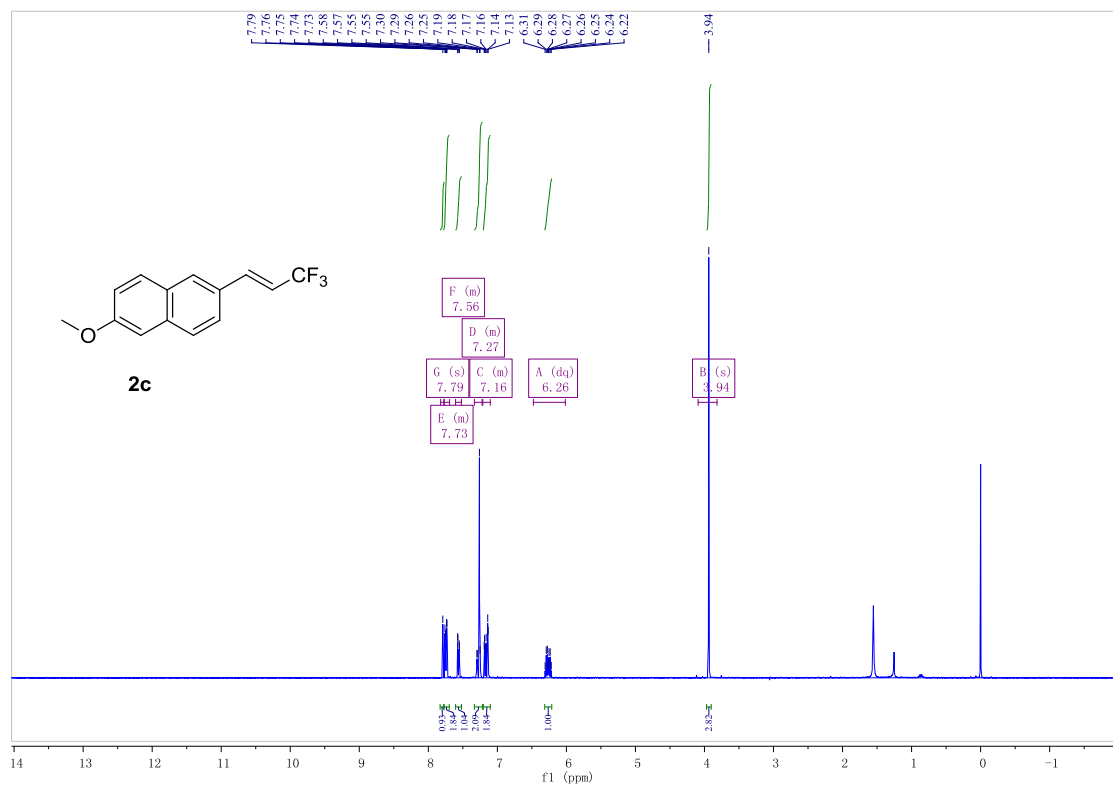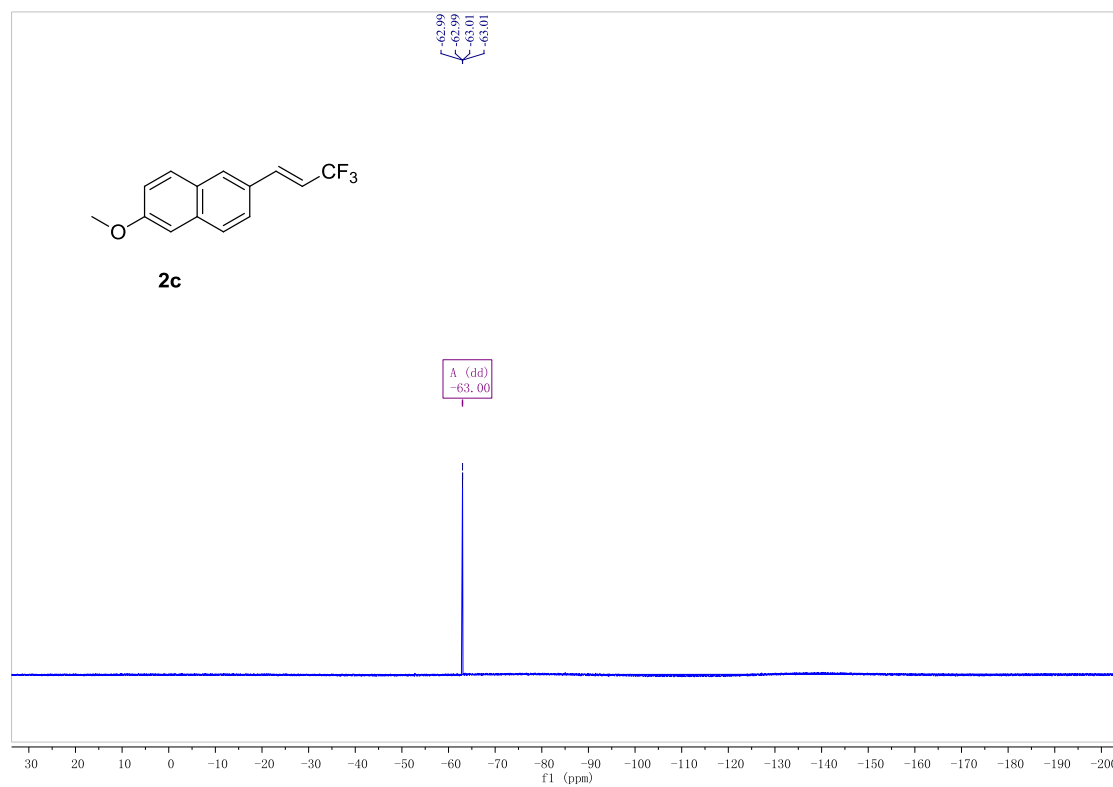



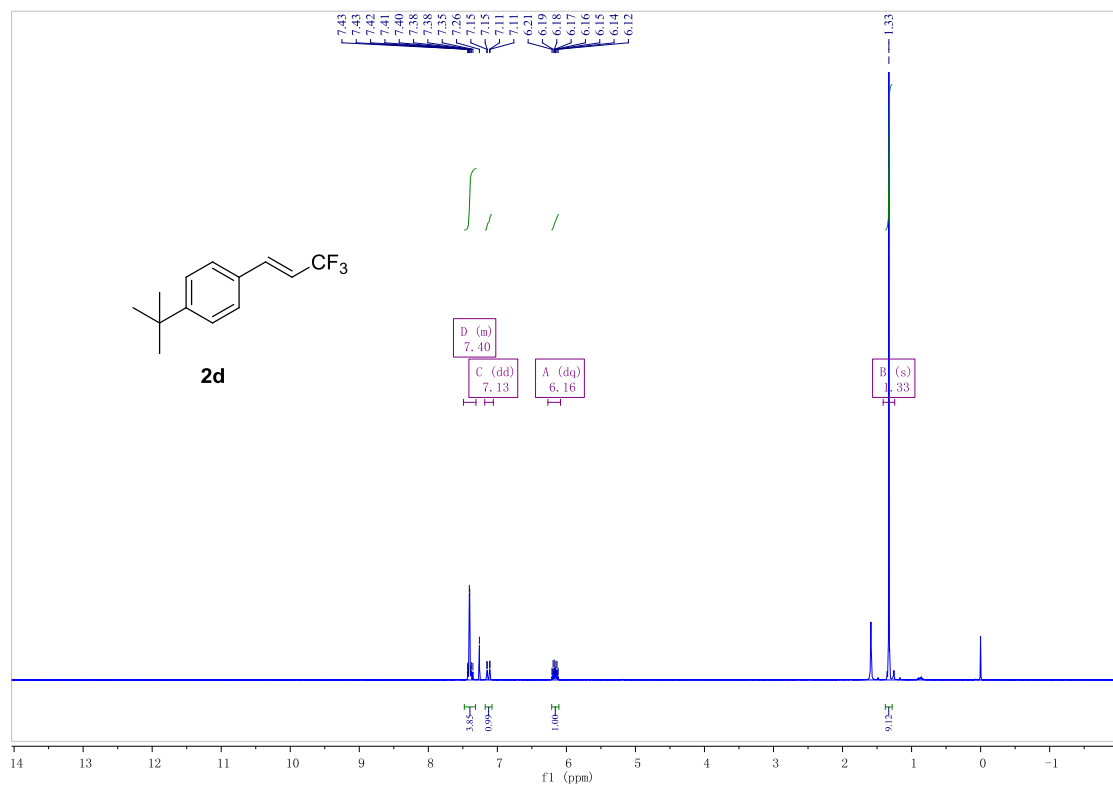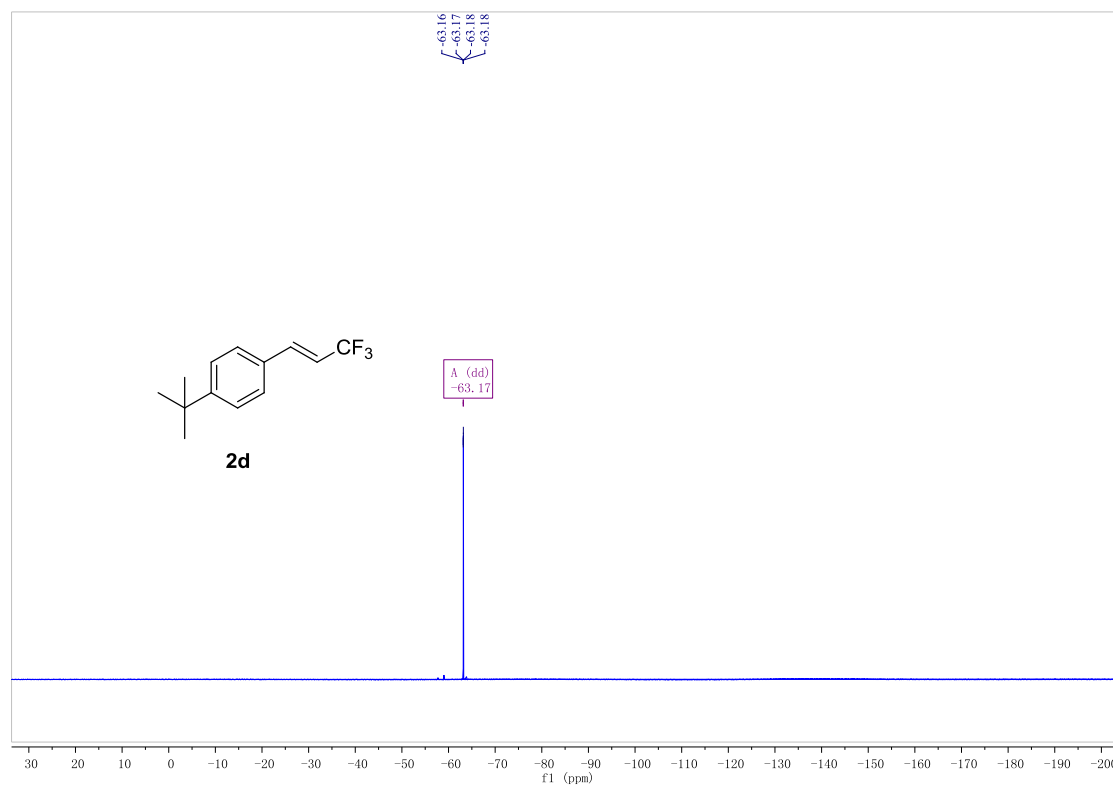

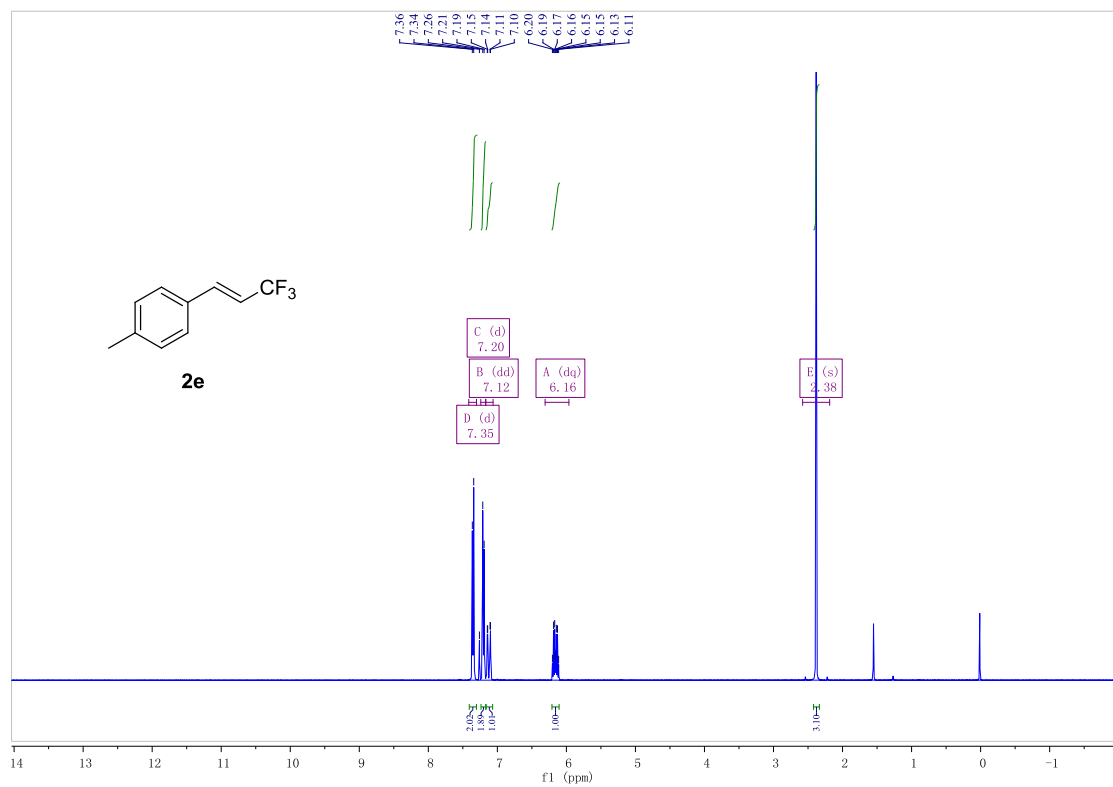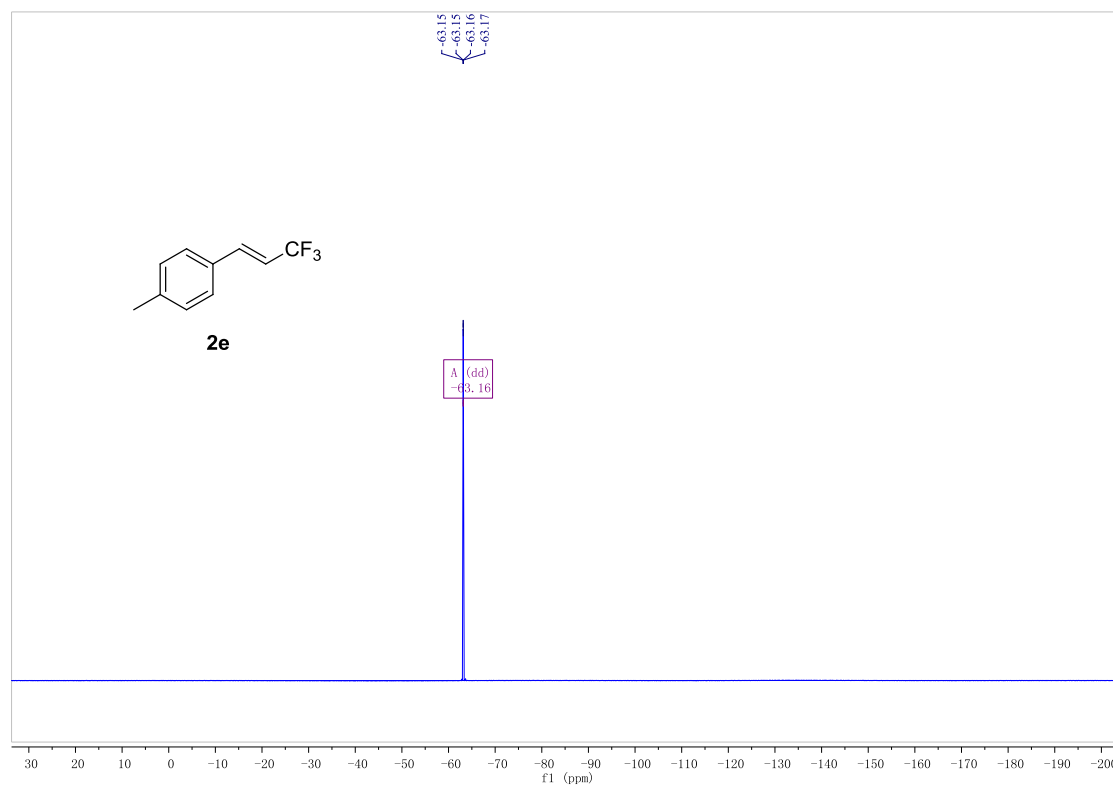

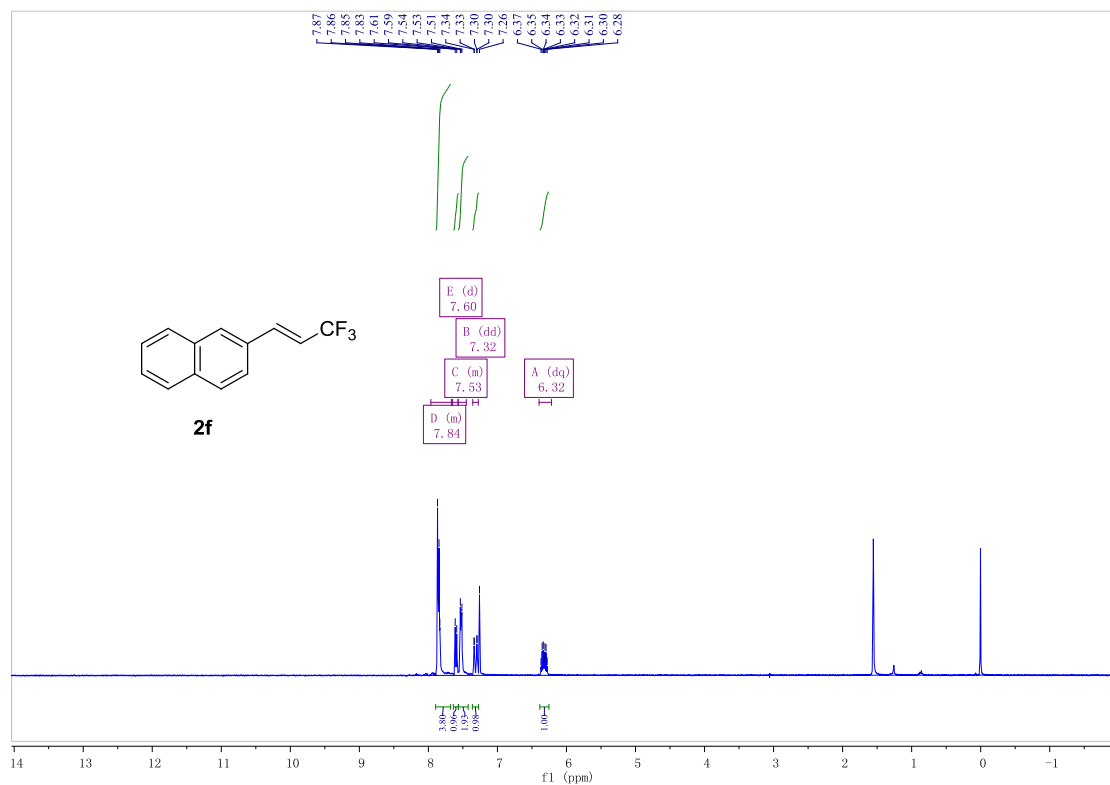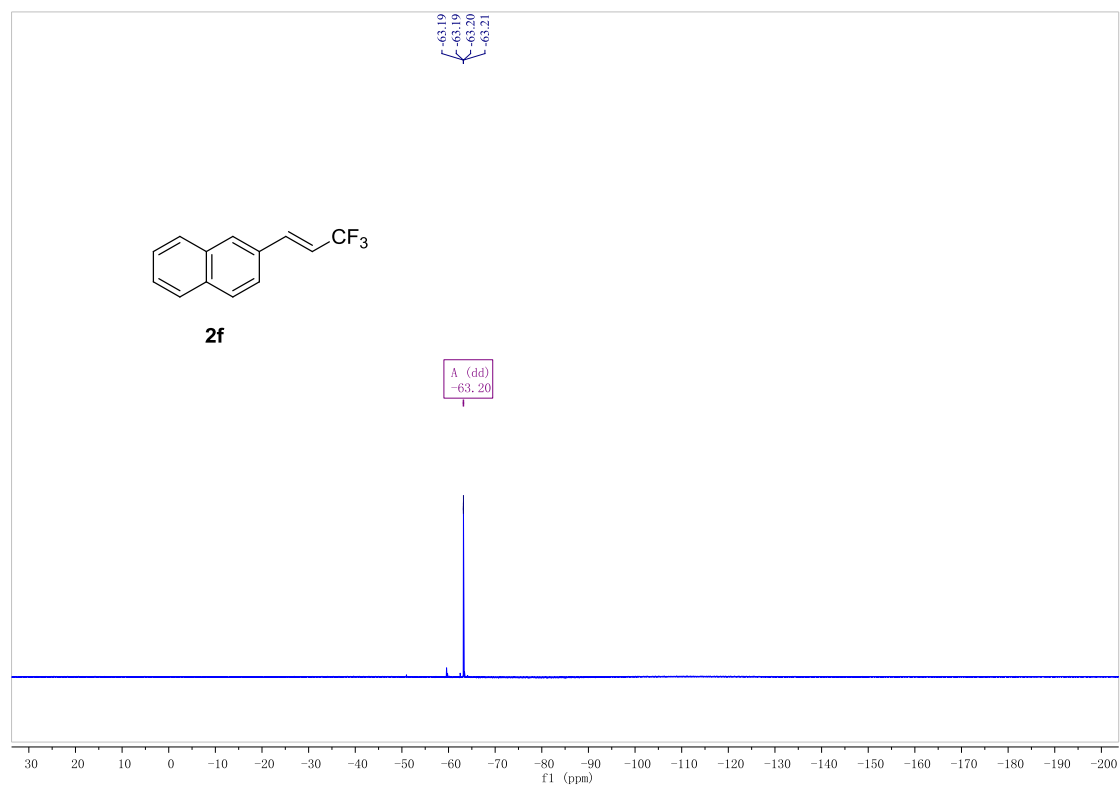

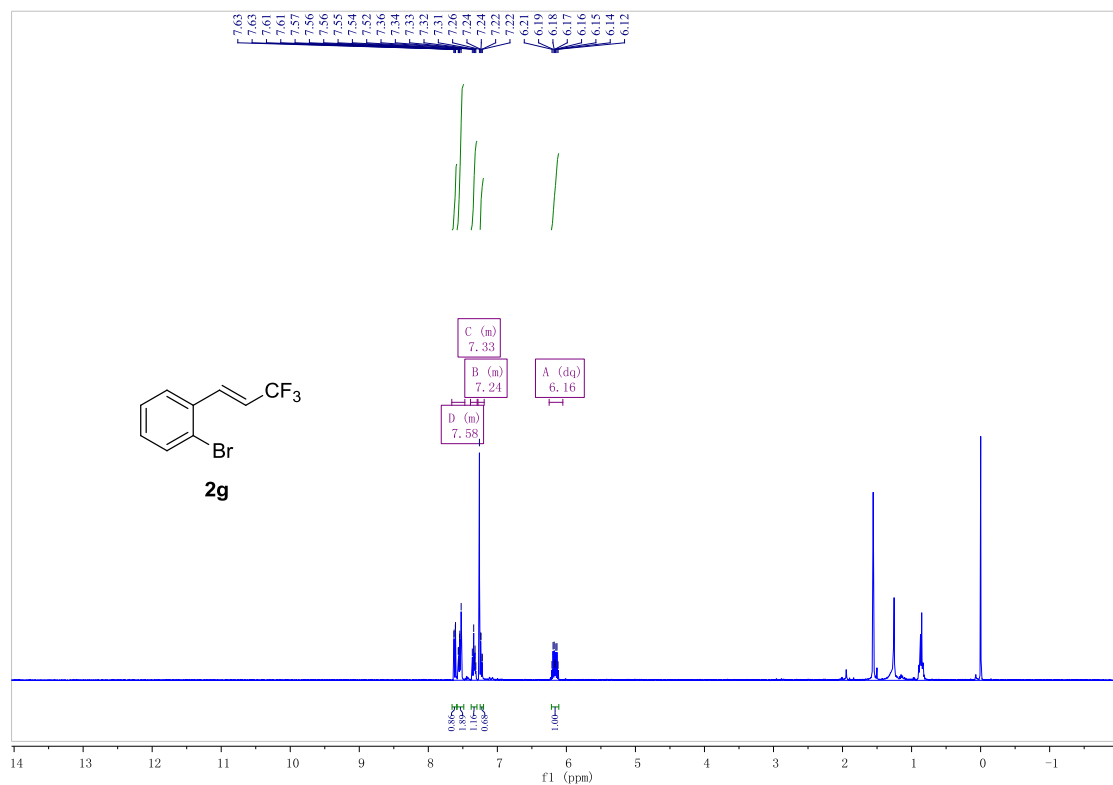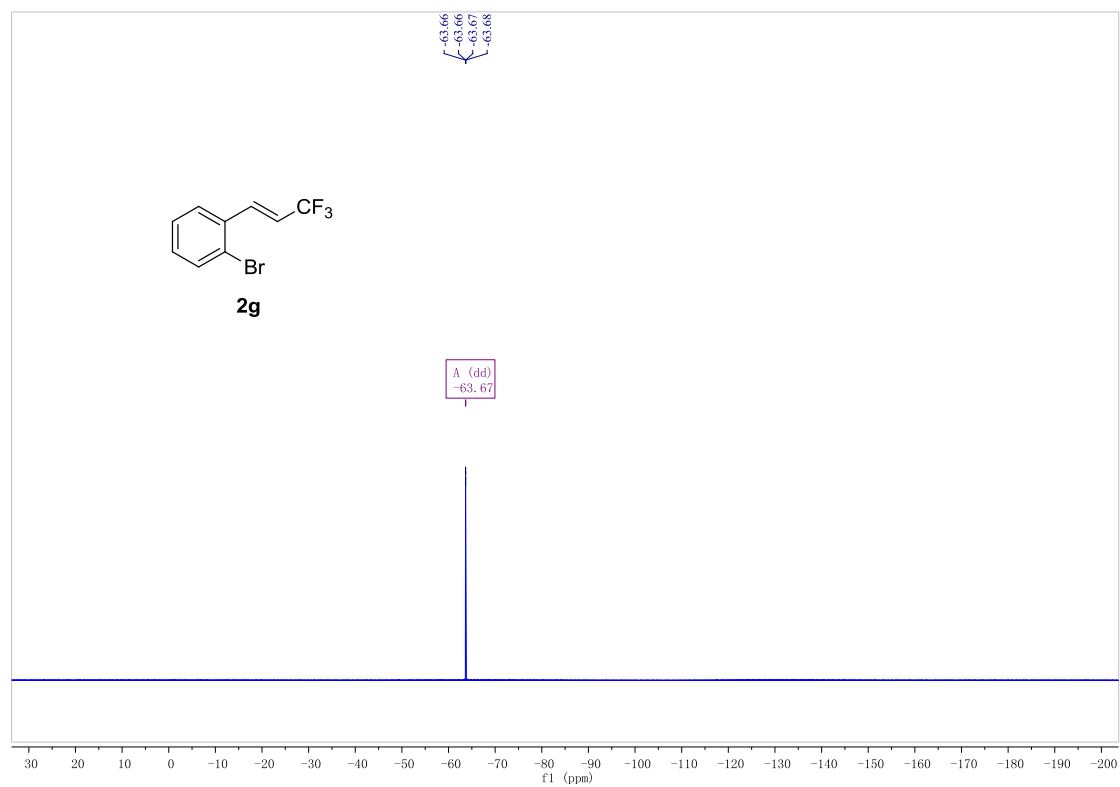

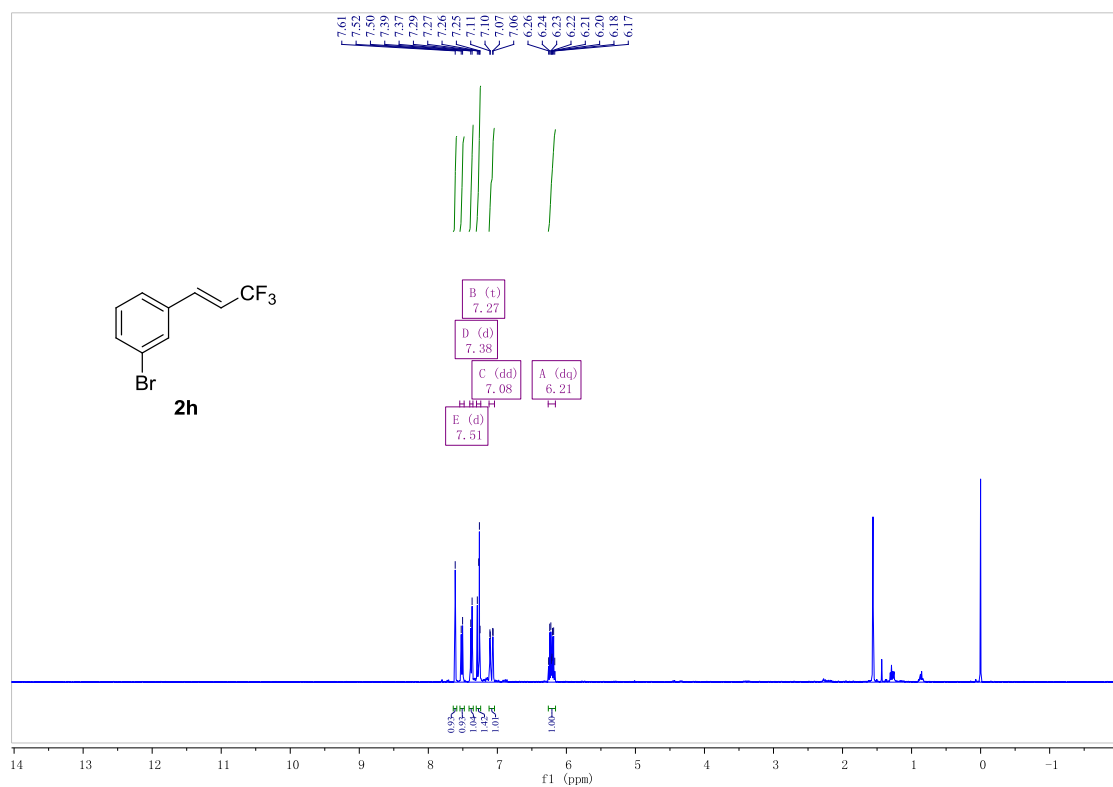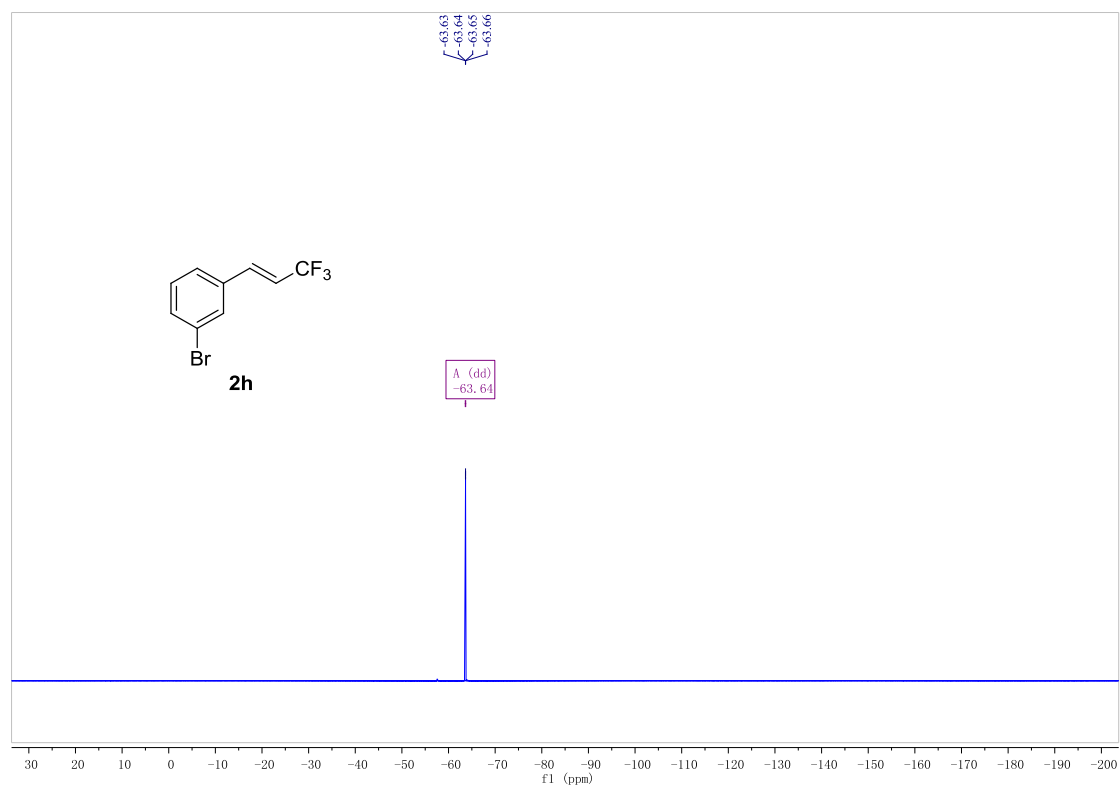

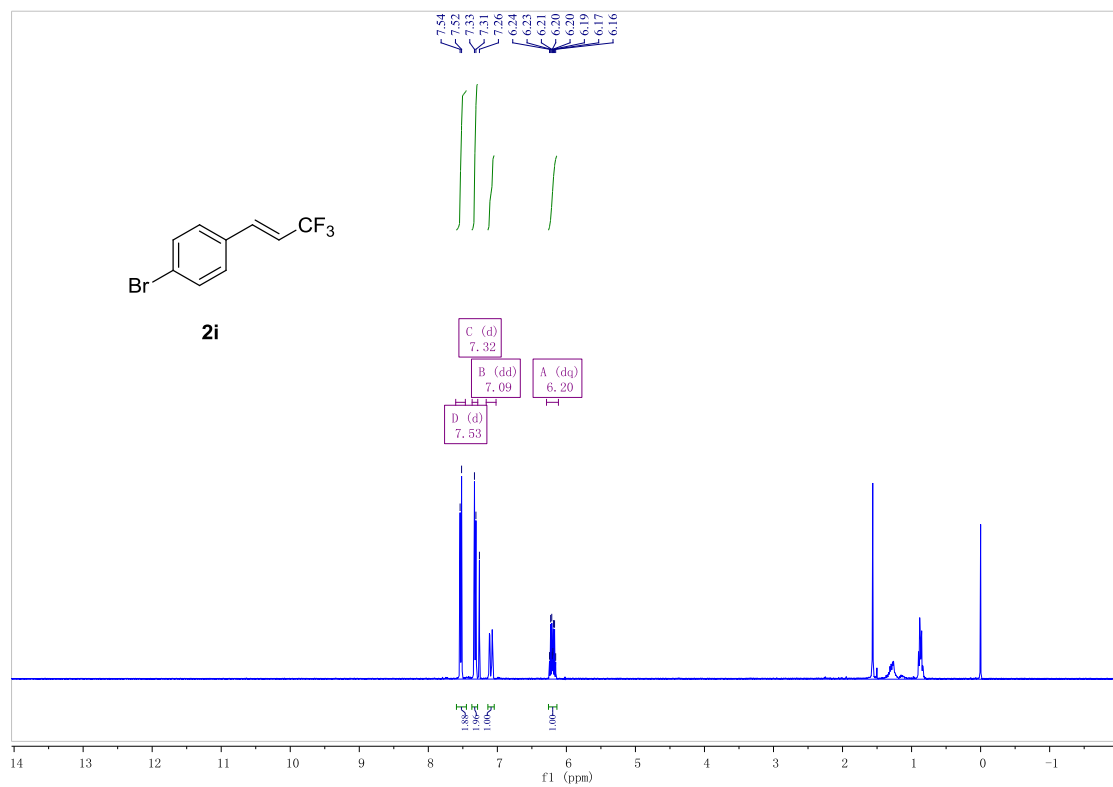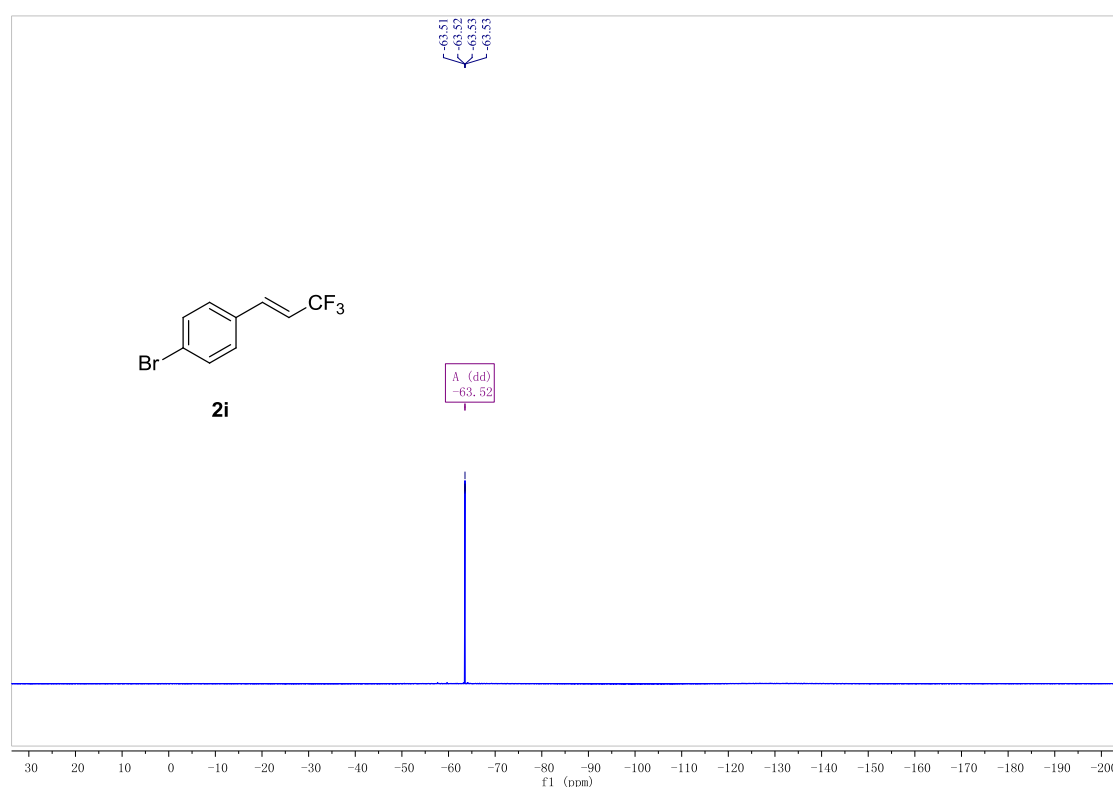

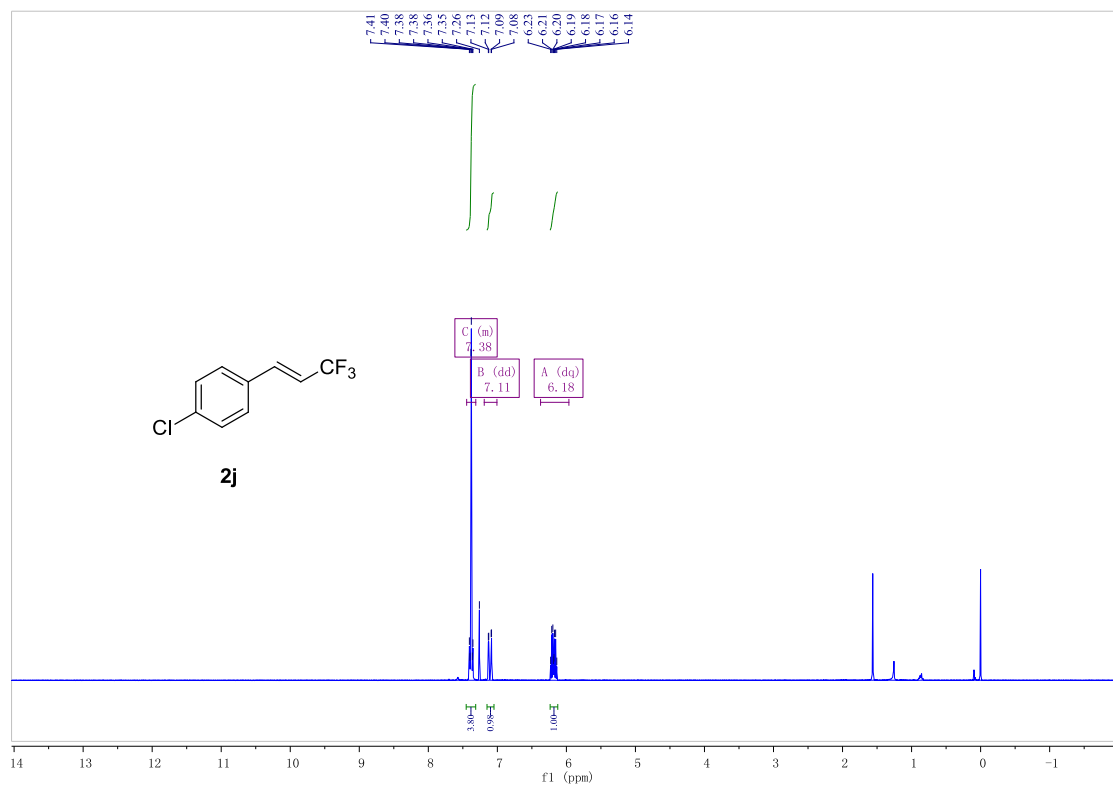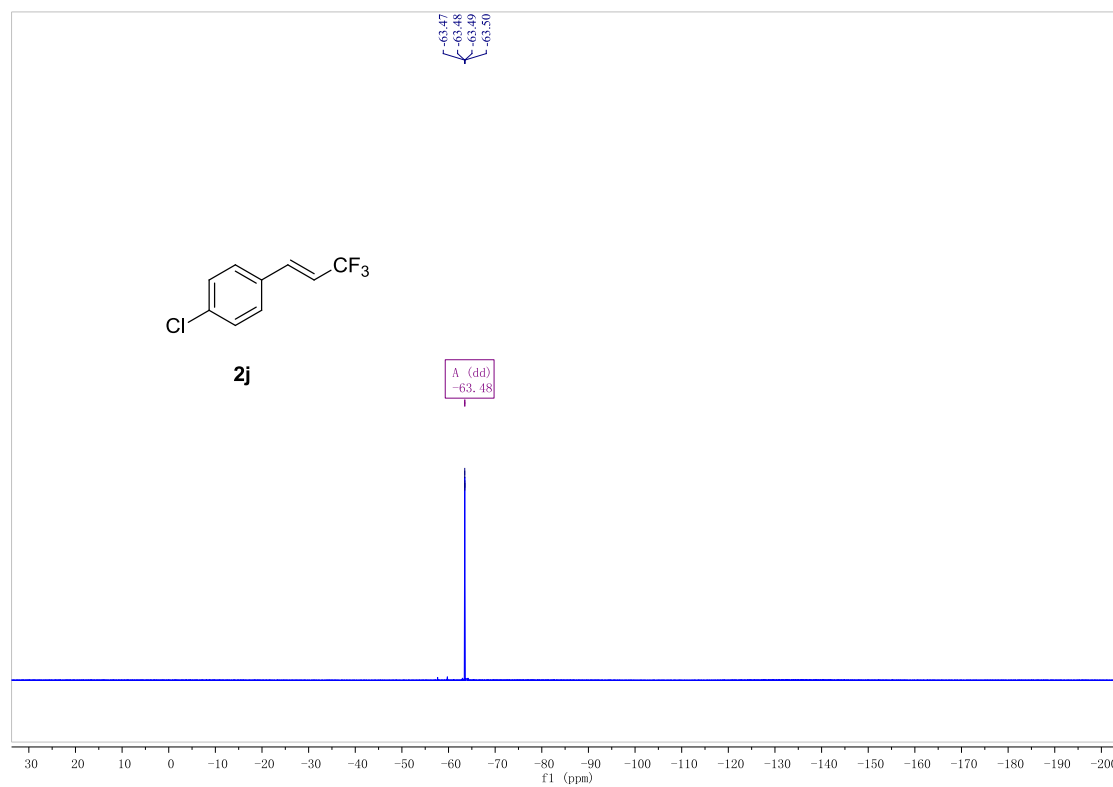

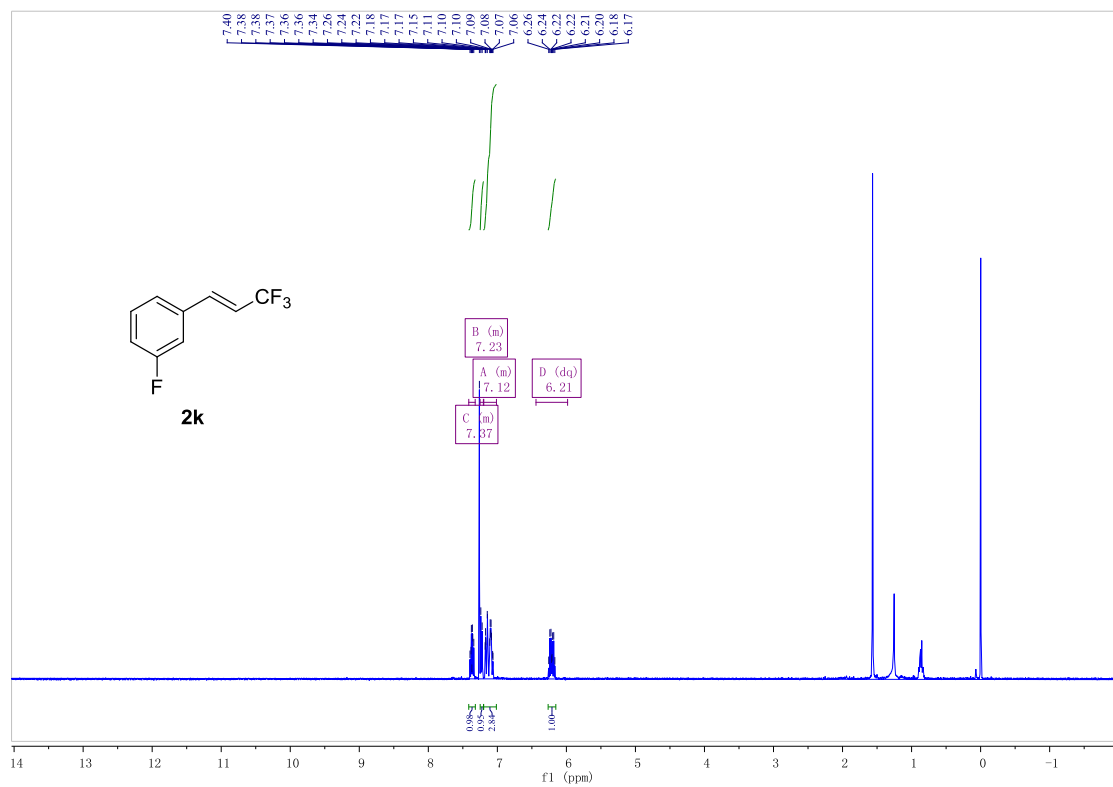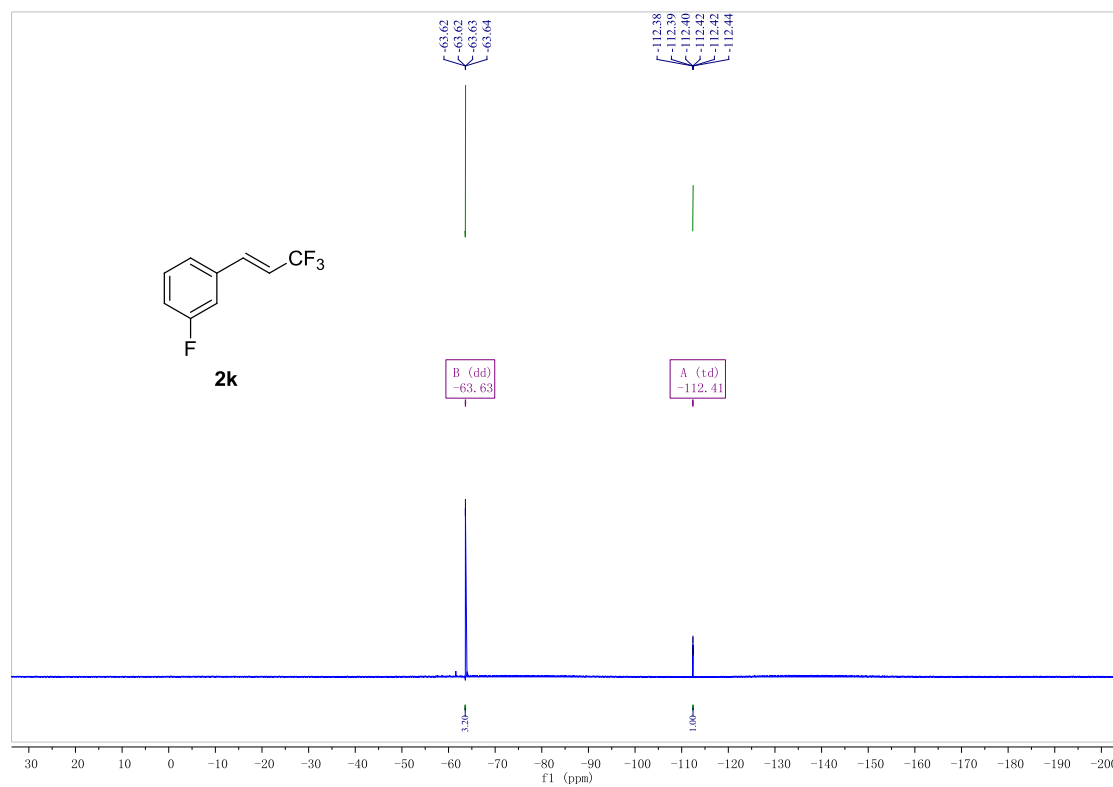



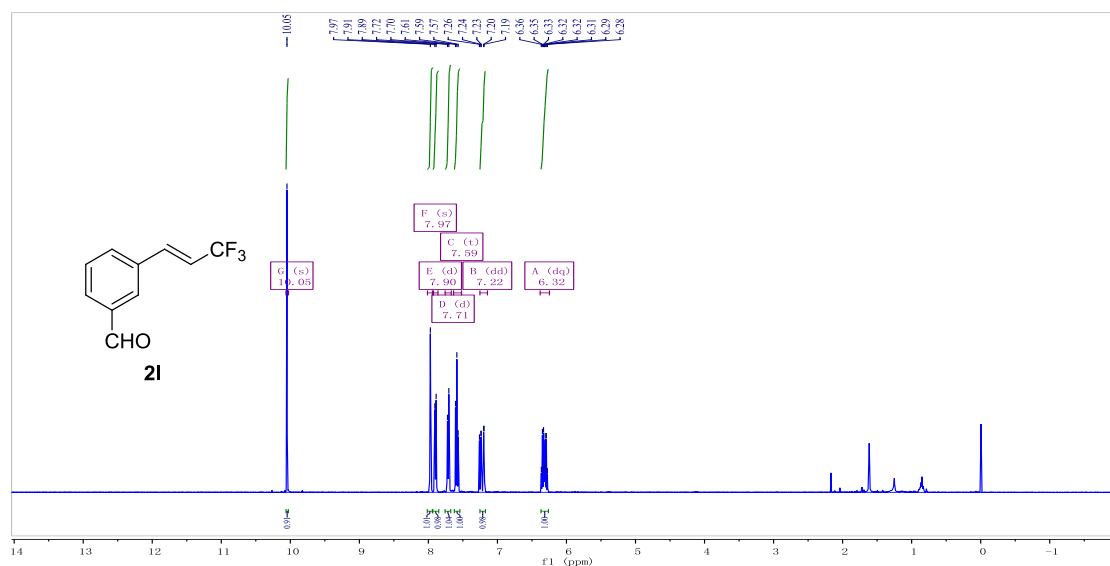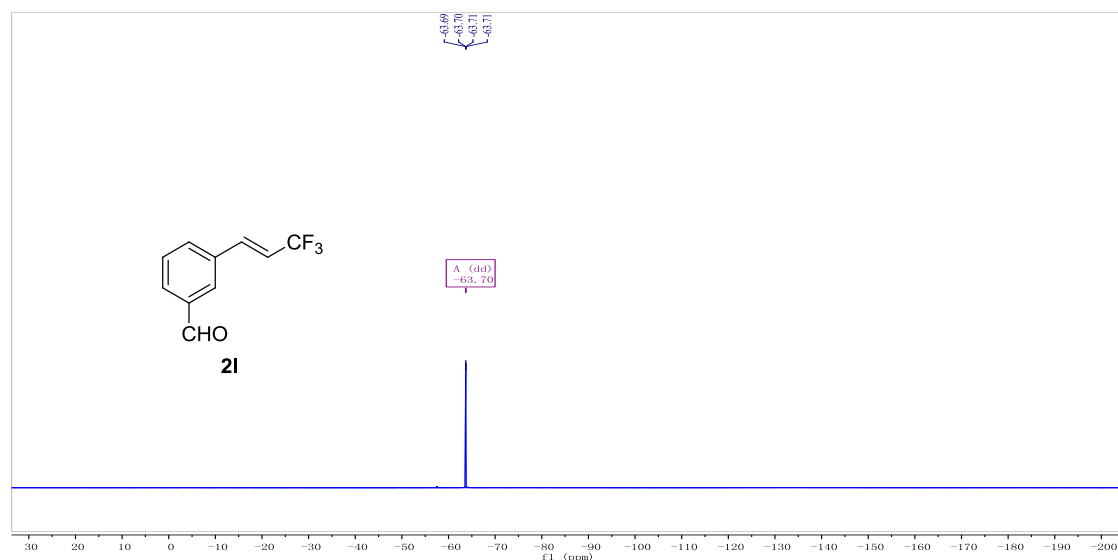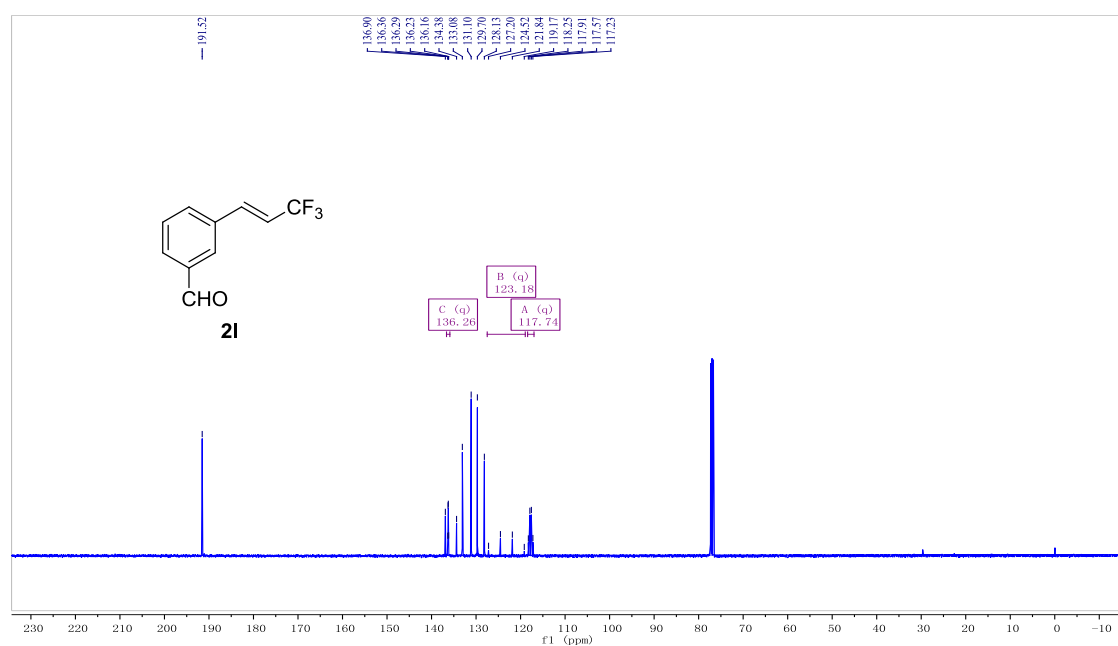

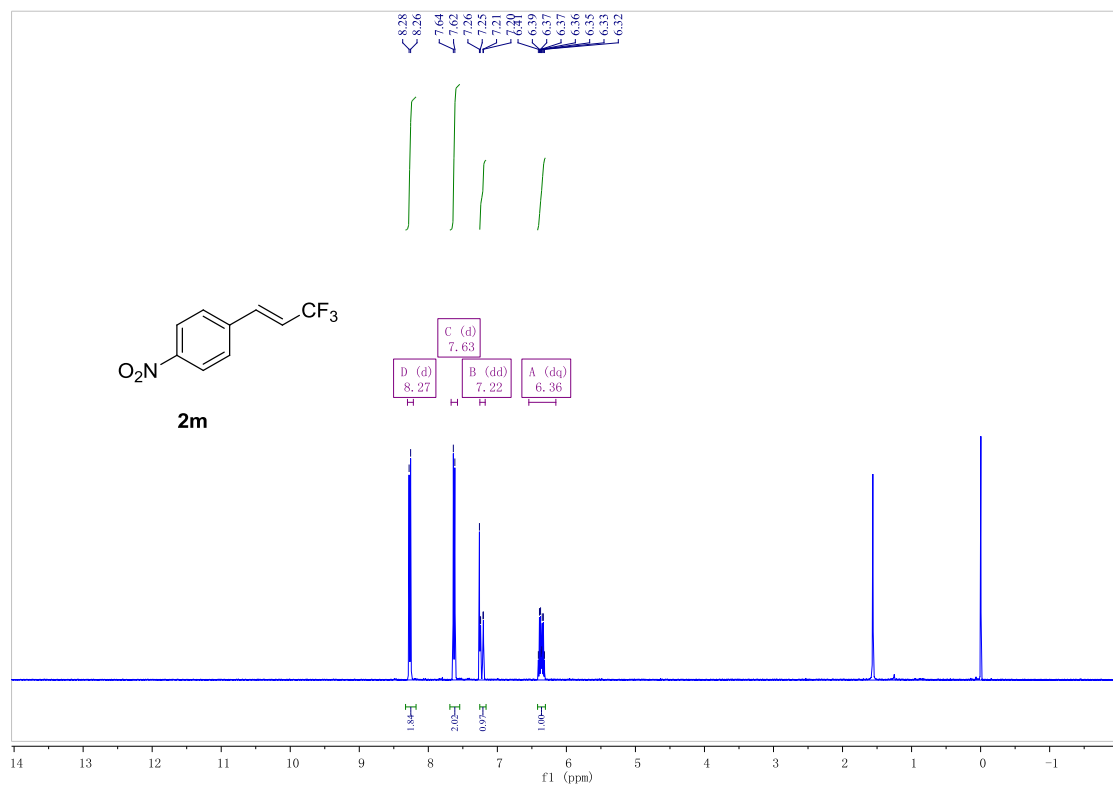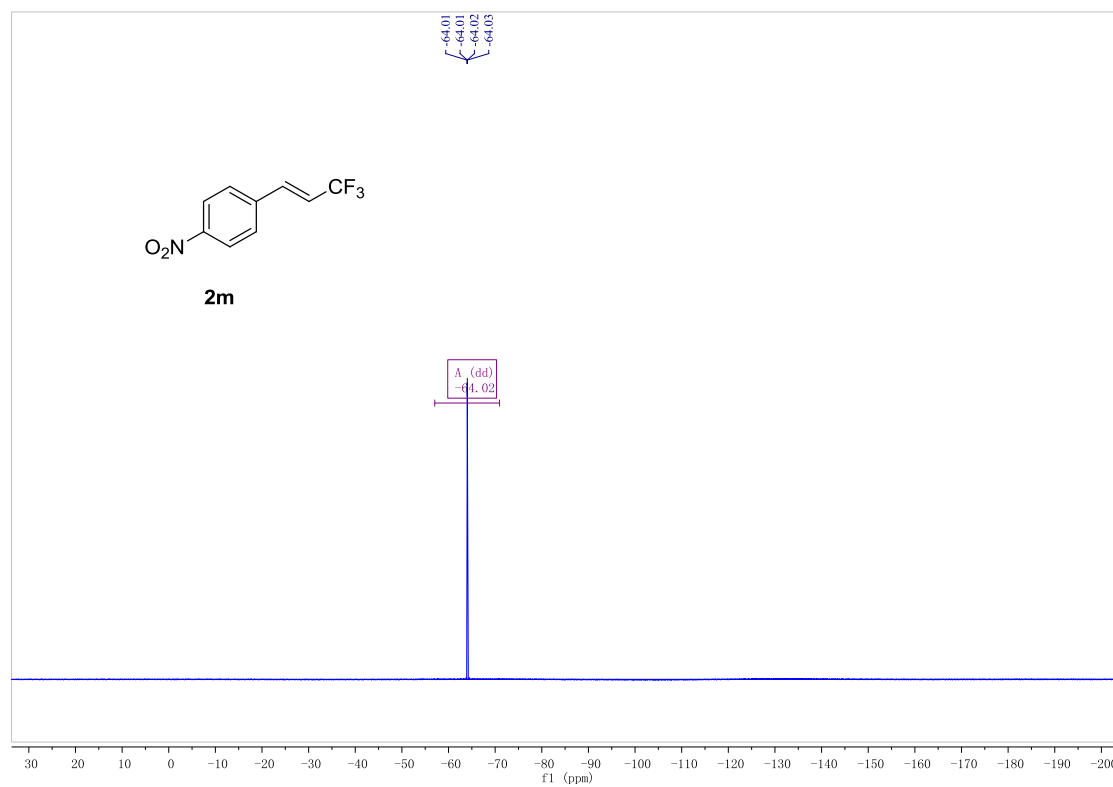

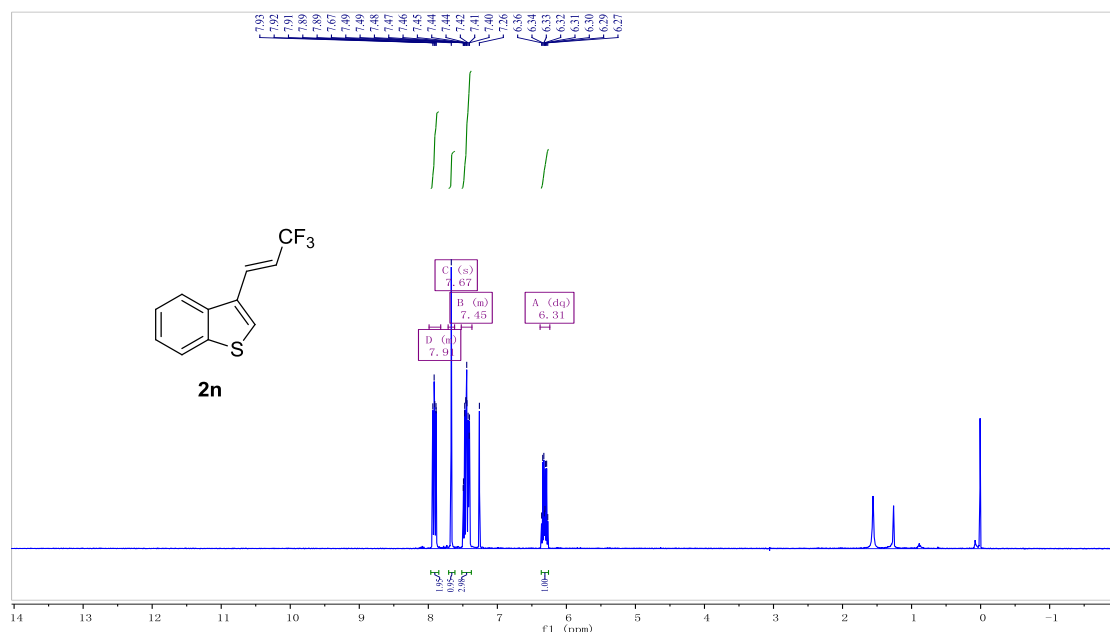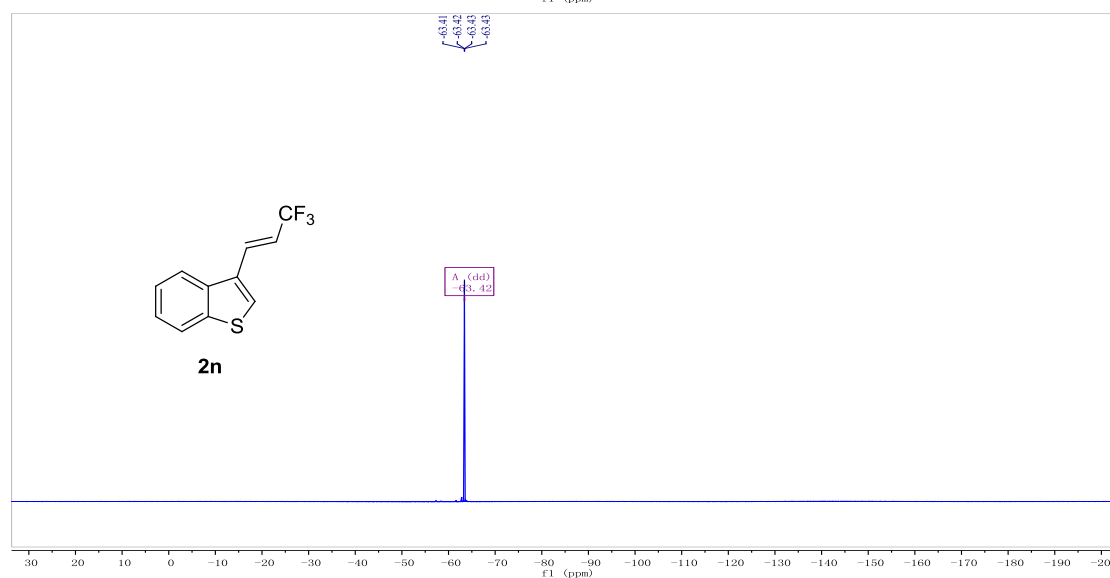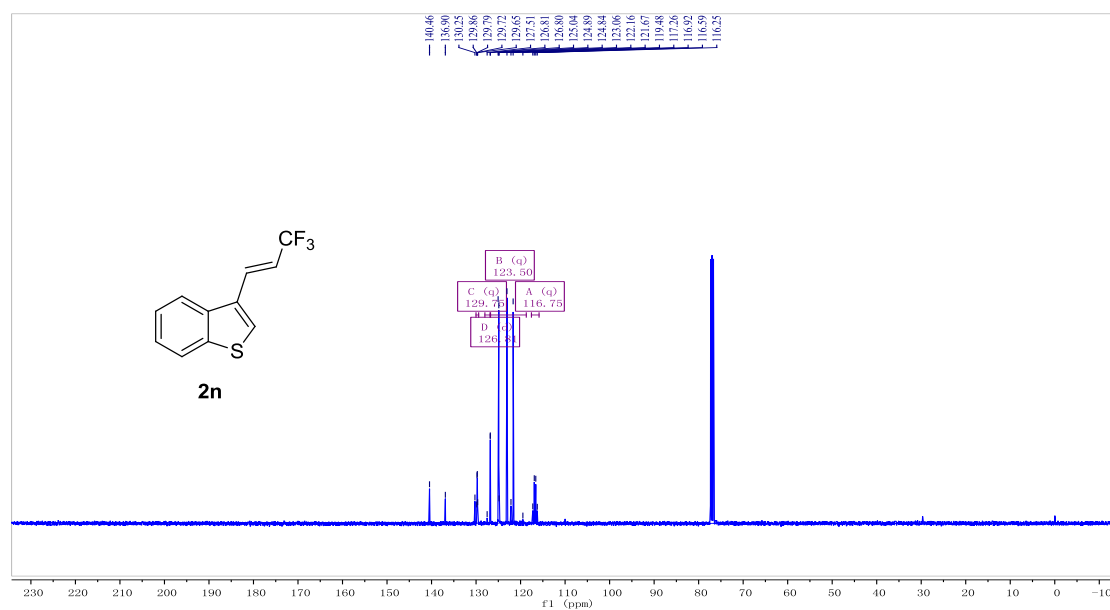

Supplement: Beilstein_J_Org_Chem-09-2635-s001.pdf [file Beilstein_J_Org_Chem-09-2635-s001.pdf]
